# Supplementary material
Source: PubMed Central journal article supplement (PMC4843780)
Supplement: NIHMS777859-supplement-01.pdf [file NIHMS777859-supplement-01.pdf]

|            | <b>P9: c.94C&gt;T (p.P32S)</b> |   |          |   |   | <b>P7: c.395C&gt;G (p.S132C)</b> |   |          |   |   |
|------------|--------------------------------|---|----------|---|---|----------------------------------|---|----------|---|---|
| variant    | N                              | K | <b>S</b> | I | L | E                                | G | <b>C</b> | I | L |
| Human      | N                              | K | P        | I | L | E                                | G | S        | I | L |
| Chimpanzee | N                              | K | P        | I | L | E                                | G | S        | I | L |
| Mouse      | N                              | K | P        | I | L | E                                | G | S        | I | L |
| Dog        | N                              | K | P        | I | L | E                                | G | S        | I | L |
| Chicken    | -                              | - | -        | - | - | E                                | G | S        | I | V |
| Fruit fly  | N                              | K | P        | I | L | E                                | G | T        | I | V |
| Roundworm  | N                              | K | P        | M | M | E                                | G | T        | I | A |

  

|            | <b>P5: c.721C&gt;T (p.P241S)</b> |   |          |   |   | <b>P5: c.1034T&gt;C (p.V345A)</b> |   |          |   |   |
|------------|----------------------------------|---|----------|---|---|-----------------------------------|---|----------|---|---|
| variant    | K                                | Q | <b>S</b> | E | R | L                                 | E | <b>A</b> | R | M |
| Human      | K                                | Q | P        | E | R | L                                 | E | V        | R | M |
| Chimpanzee | K                                | Q | P        | E | R | -                                 | - | V        | R | M |
| Mouse      | K                                | H | P        | E | R | -                                 | - | V        | R | M |
| Dog        | K                                | Q | P        | E | Q | -                                 | - | V        | R | M |
| Chicken    | Q                                | H | P        | E | K | -                                 | - | V        | R | M |
| Fruit fly  | K                                | Q | S        | P | K | -                                 | - | V        | R | I |
| Roundworm  | T                                | K | S        | D | K | -                                 | - | C        | R | L |

**Supp. Figure S1: Alignment of amino acids at sites of novel sequence variants.**

Sites of novel sequence variants reported here in subjects P5, P7, and P9 are depicted in the alignments of various species from human to roundworm. Darker shading indicates a greater degree of amino acid conservation.
